# Supplementary material
Source: MDPI journal article supplement (https://www.mdpi.com/2073-4433/10/5/228)
Supplement: s1 [file s1]

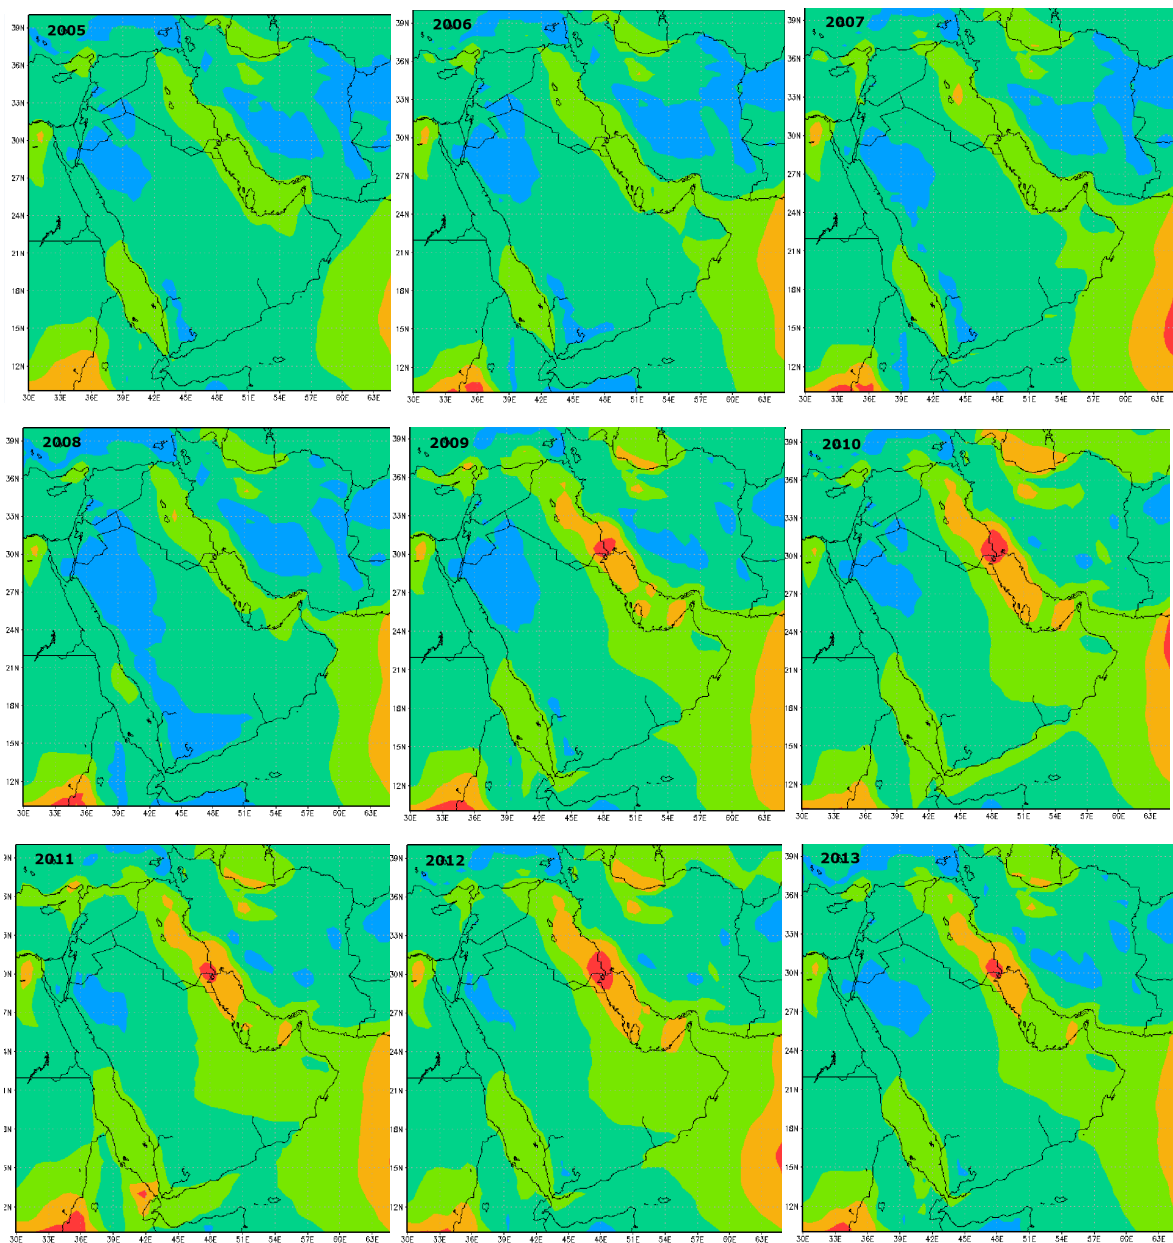

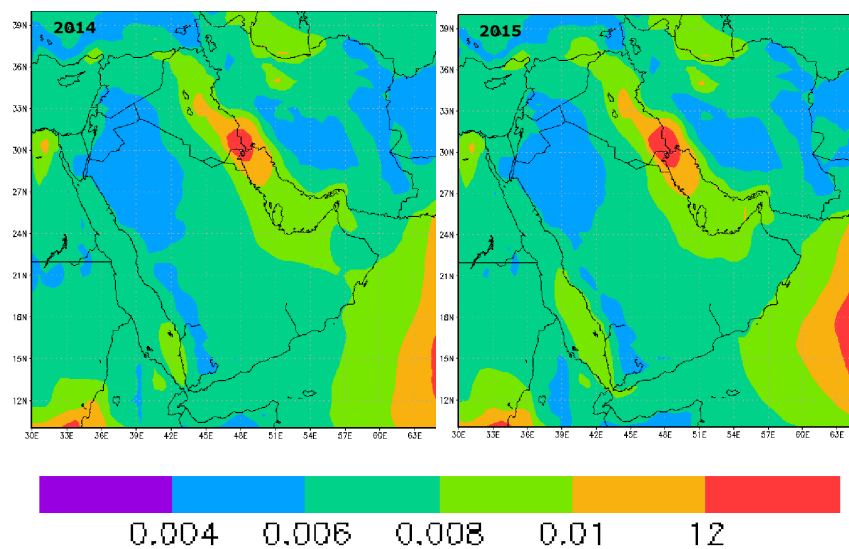

**Figure S1:** Inter-annual variation of Black Carbon AOT over the Arabian Peninsula from 2005 through 2015.

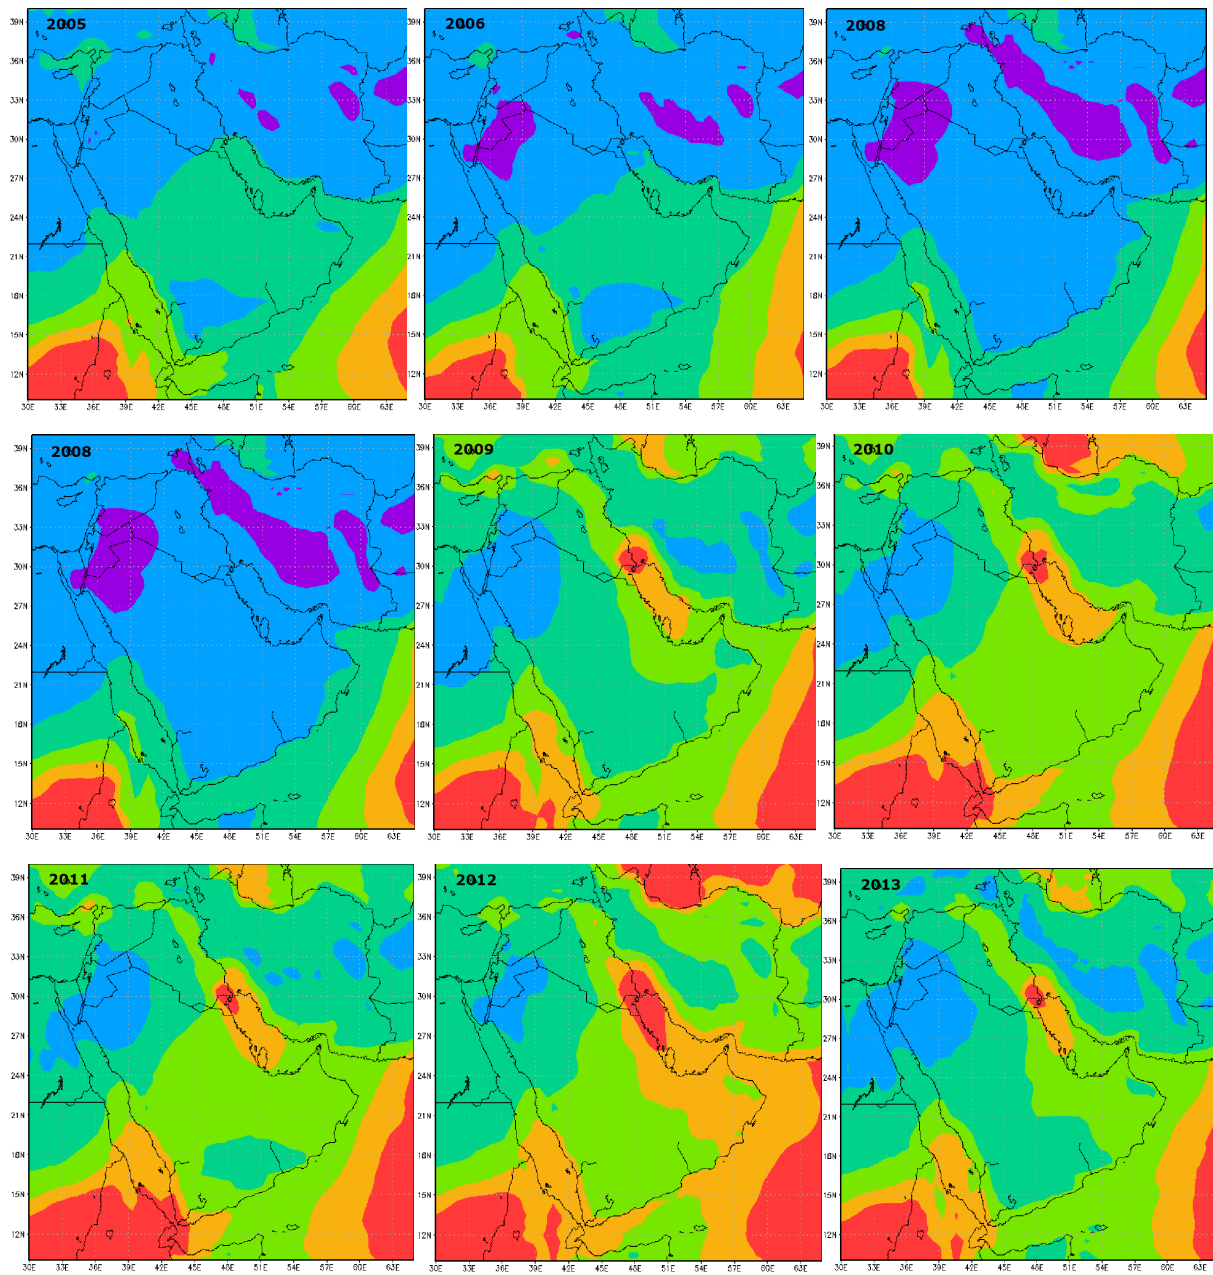

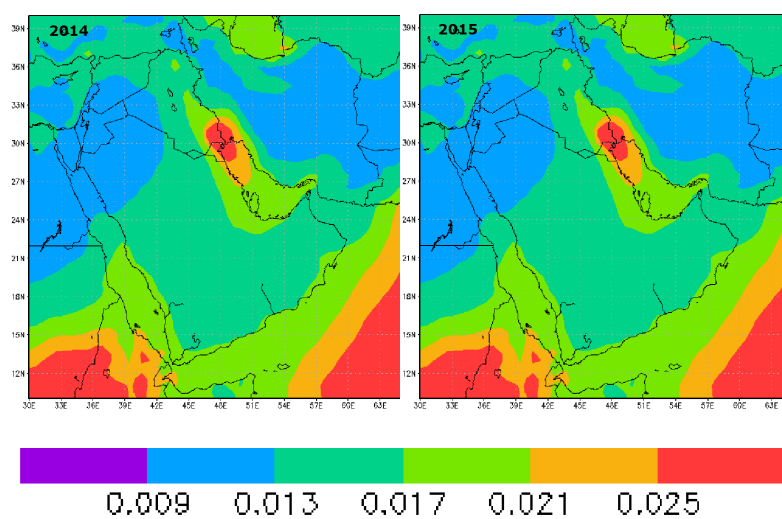

**Figure S2:** Inter-annual variation of Organic Carbon AOT over the Arabian Peninsula from 2005 through 2015.

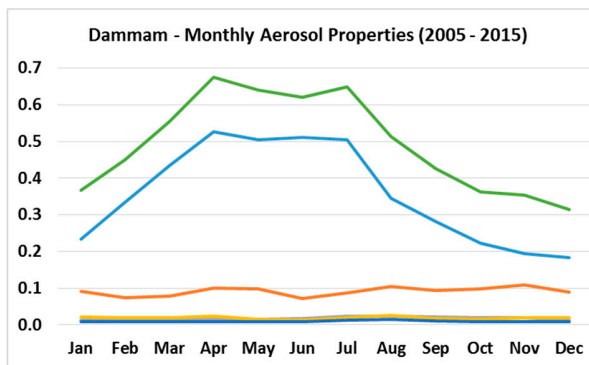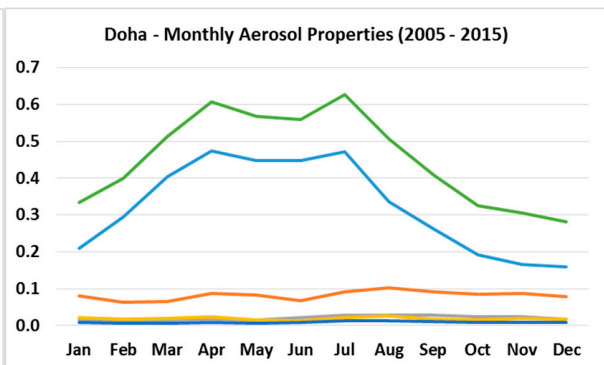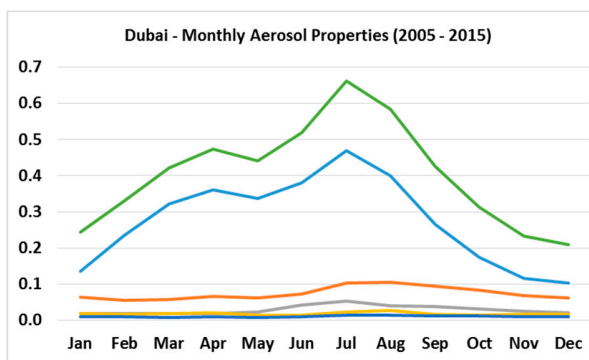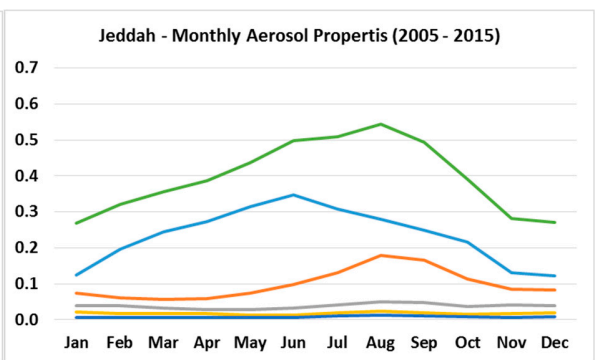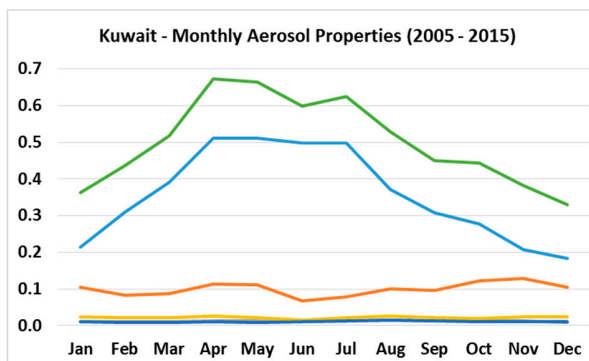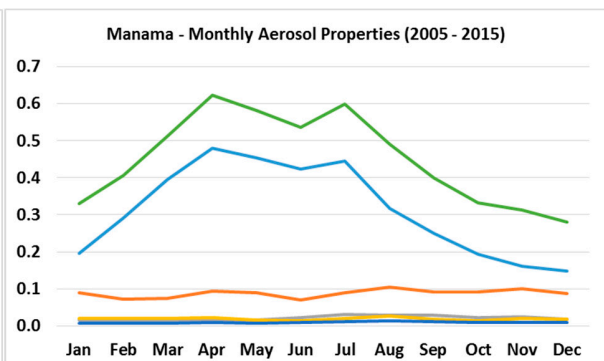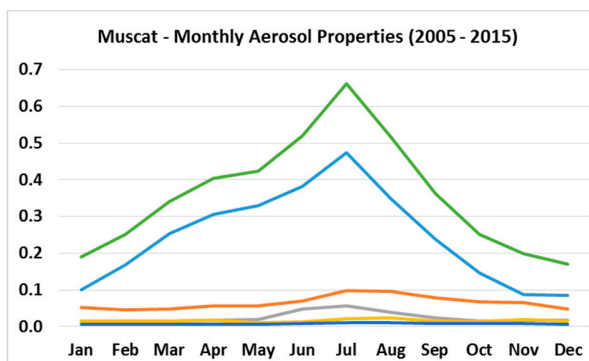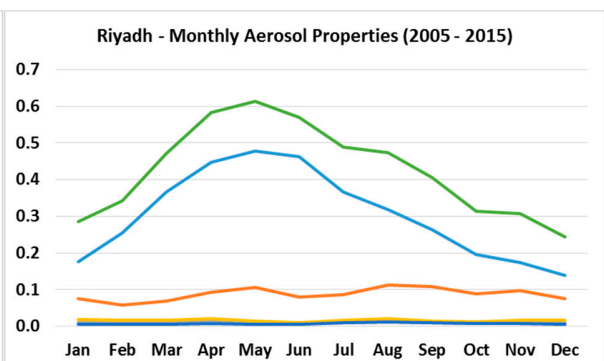

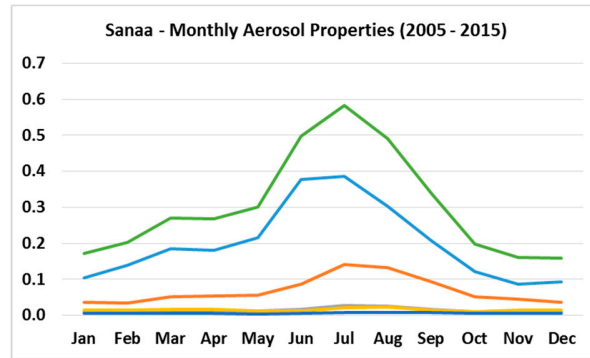

**Figure S3:** Monthly variation in aerosol AOT over the Arabian Peninsula cities
